# Supplementary material for: Interfacial-Water-Modulated Photoluminescence of Single-Layer WS2 on Mica
Source: MDPI journal article supplement (doi:10.3390/ijms24043492), 2023-02-09
Supplement: s1 [file s1]

# **Supporting Information for**

## **Interfacial-Water-Modulated Photoluminescence of Single-Layer**

### **WS2 on Mica**

**Yanghee Kim <sup>1,†</sup>, Haneul Kang <sup>1,†</sup>, Myeongin Song <sup>1</sup>, Hyuksang Kwon <sup>2</sup> and Sunmin Ryu <sup>1,\*</sup>**

<sup>1</sup>Department of Chemistry, Pohang University of Science and Technology (POSTECH),  
Pohang 37673, Republic of Korea

<sup>2</sup>Korea Research Institute of Standards and Science, Daejeon 34113, Republic of Korea

\* Correspondence: sunryu@postech.ac.kr

† These authors contributed equally to this work.

## **Contents**

### **A. Supporting Data**

## A. Supporting Data

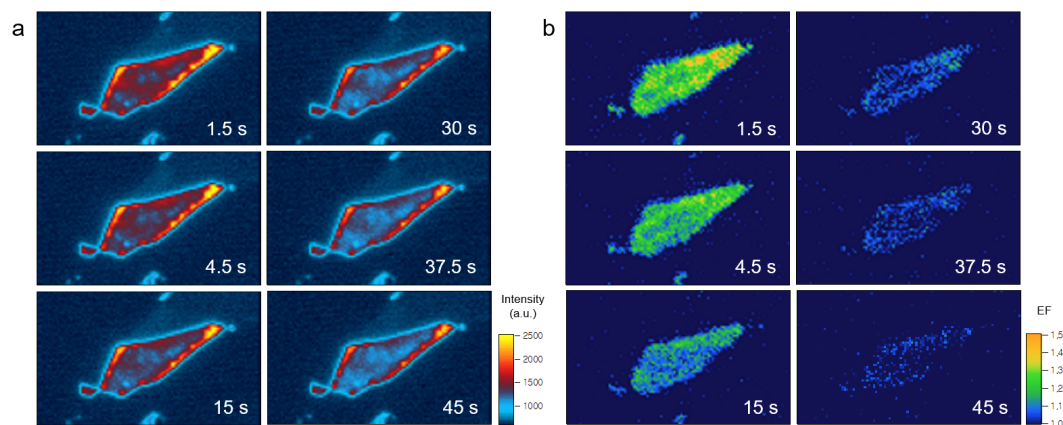

**Figure S1. Undoping of WS<sub>2</sub> in Ar gas.** (a & b) Time-lapse PL images (a) and PL enhancement images (b) of the sample in Fig. 4. The sample was pre-equilibrated with Ar:O<sub>2</sub> gas sufficiently before exposure to Ar gas at time zero. The enhancement factor (EF) was calculated by normalizing each PL image with respect to that at time zero.
